# Supplementary material
Source: Elsevier journal article supplement (https://comptes-rendus.academie-sciences.fr/geoscience/article/10.1016/j.crte.2017.02.003/file/attach/mmc1.pdf)
Supplement: mmc1 [file mmc1.pdf]

|                                      |                  |                              |
|--------------------------------------|------------------|------------------------------|
| Sample ID: <b>Rochefort-Montagne</b> | Lab# N-1295-01   | J = 0.000724600 ± 0.00000290 |
| Sanidine                             | Irradiation # 67 | reactor OSIRIS               |
| Flux standard ACS-2                  | 1.193 Ma         |                              |

| Lab. N°         | <sup>40</sup> Ar (moles) | <sup>36</sup> Ar V | %1σ         | <sup>37</sup> Ar V | %1σ          | <sup>38</sup> Ar V | %1σ         | <sup>39</sup> Ar V | %1σ         | <sup>40</sup> Ar V | %1σ         | D <sup>(1)</sup> | ±%σ <sub>D</sub> | % <sup>40</sup> Ar* | Age (ka)    | ±1σ (ka)  | K/Ca ± 1σ       |
|-----------------|--------------------------|--------------------|-------------|--------------------|--------------|--------------------|-------------|--------------------|-------------|--------------------|-------------|------------------|------------------|---------------------|-------------|-----------|-----------------|
| N1295-01        | 1.368E-14                | 1.832E-06          | 2.02        | 5.232E-05          | 8.21         | 6.604E-05          | 0.42        | 4.291E-03          | 0.19        | 9.985E-03          | 0.18        | 1.0136           | 0.2              | 94.6                | 2875        | 8         | 35.3 2.9        |
| N1295-02        | 1.441E-14                | 7.869E-07          | 9.38        | 6.990E-05          | 4.98         | 5.866E-05          | 0.40        | 3.872E-03          | 0.21        | 1.051E-02          | 0.15        | 1.0115           | 0.2              | 97.8                | 3469        | 12        | 23.8 1.2        |
| <b>N1295-03</b> | <b>1.683E-14</b>         | <b>1.489E-06</b>   | <b>7.19</b> | <b>7.117E-05</b>   | <b>7.73</b>  | <b>8.410E-05</b>   | <b>0.42</b> | <b>5.599E-03</b>   | <b>0.20</b> | <b>1.228E-02</b>   | <b>0.13</b> | <b>1.0142</b>    | <b>0.2</b>       | <b>96.4</b>         | <b>2764</b> | <b>10</b> | <b>33.8 2.6</b> |
| N1295-04        | 1.091E-14                | 1.653E-06          | 6.23        | 4.600E-05          | 5.94         | 5.124E-05          | 0.36        | 3.400E-03          | 0.18        | 7.961E-03          | 0.10        | 1.0130           | 0.2              | 93.9                | 2871        | 13        | 31.8 1.9        |
| N1295-05        | 1.021E-14                | 8.259E-07          | 4.03        | 5.485E-05          | 8.18         | 7.722E-05          | 0.50        | 3.259E-03          | 0.16        | 7.451E-03          | 0.10        | 1.0129           | 0.2              | 96.8                | 2891        | 7         | 25.5 2.1        |
| N1295-06        | 1.397E-14                | 5.443E-06          | 0.96        | 8.298E-05          | 7.33         | 5.915E-05          | 0.50        | 3.851E-03          | 0.19        | 1.020E-02          | 0.07        | 1.0136           | 0.2              | 84.3                | 2916        | 8         | 20.0 1.5        |
| N1295-07        | 8.664E-15                | 1.037E-06          | 2.63        | 4.986E-05          | 9.84         | 4.065E-05          | 0.47        | 2.688E-03          | 0.20        | 6.324E-03          | 0.11        | 1.0125           | 0.2              | 95.2                | 2925        | 8         | 23.2 2.3        |
| N1295-08        | 1.518E-14                | 5.168E-07          | 5.73        | 1.456E-04          | 5.03         | 4.948E-05          | 0.48        | 3.263E-03          | 0.20        | 1.108E-02          | 0.08        | 1.0139           | 0.2              | 98.7                | 4378        | 10        | 9.6 0.5         |
| <b>N1295-09</b> | <b>6.405E-15</b>         | <b>8.457E-07</b>   | <b>3.94</b> | <b>2.399E-05</b>   | <b>19.29</b> | <b>3.188E-05</b>   | <b>0.46</b> | <b>2.101E-03</b>   | <b>0.20</b> | <b>4.675E-03</b>   | <b>0.08</b> | <b>1.0121</b>    | <b>0.2</b>       | <b>94.7</b>         | <b>2752</b> | <b>9</b>  | <b>37.7 7.3</b> |
| N1295-10        | 1.538E-14                | 2.032E-06          | 1.54        | 5.459E-05          | 6.08         | 7.492E-05          | 0.41        | 4.941E-03          | 0.22        | 1.123E-02          | 0.11        | 1.0139           | 0.2              | 94.7                | 2809        | 7         | 38.9 2.4        |
| N1295-11        | 1.914E-14                | 9.586E-06          | 0.77        | 1.010E-04          | 5.77         | 8.057E-05          | 0.50        | 4.990E-03          | 0.18        | 1.397E-02          | 0.05        | 1.0147           | 0.2              | 79.8                | 2917        | 8         | 21.3 1.2        |
| <b>N1295-12</b> | <b>5.360E-15</b>         | <b>6.310E-07</b>   | <b>3.76</b> | <b>2.734E-05</b>   | <b>14.17</b> | <b>2.639E-05</b>   | <b>0.50</b> | <b>1.760E-03</b>   | <b>0.18</b> | <b>3.913E-03</b>   | <b>0.08</b> | <b>1.0119</b>    | <b>0.2</b>       | <b>95.3</b>         | <b>2767</b> | <b>8</b>  | <b>27.7 3.9</b> |
| <b>N1295-13</b> | <b>5.605E-15</b>         | <b>6.005E-07</b>   | <b>6.24</b> | <b>1.976E-05</b>   | <b>17.15</b> | <b>2.808E-05</b>   | <b>0.59</b> | <b>1.847E-03</b>   | <b>0.18</b> | <b>4.091E-03</b>   | <b>0.13</b> | <b>1.0118</b>    | <b>0.2</b>       | <b>95.7</b>         | <b>2768</b> | <b>10</b> | <b>40.2 6.9</b> |
| N1295-14        | 1.536E-14                | 4.886E-06          | 0.90        | 5.539E-05          | 11.59        | 6.726E-05          | 0.58        | 4.436E-03          | 0.19        | 1.121E-02          | 0.13        | 1.0139           | 0.2              | 87.1                | 2876        | 8         | 34.4 4.0        |

**Bold font** is for crystals included in the Weighted mean age calculation

| Results       | 40Ar*/39Ark ± 1σ        | Age (ka)            | ± 1σ (ka) | MSWD | (n)                 | K/Ca ± 1σ | Blank corrections |                    |          |                    |          |                    |          |                    |          |                    |          |
|---------------|-------------------------|---------------------|-----------|------|---------------------|-----------|-------------------|--------------------|----------|--------------------|----------|--------------------|----------|--------------------|----------|--------------------|----------|
|               |                         |                     |           |      |                     |           | N                 | <sup>36</sup> Ar V | ±1σ      | <sup>37</sup> Ar V | ±1σ      | <sup>38</sup> Ar V | ±1σ      | <sup>39</sup> Ar V | ±1σ      | <sup>40</sup> Ar V | ±1σ      |
| weighted mean | 2.1150 ± 0.0034 ± 0.16% | 2763                | 12        | 0.70 | 4                   | 33.5 2.1  | N1295-01          | 7.45E-07           | 2.91E-08 | 1.47E-07           | 1.03E-08 | 2.33E-07           | 2.14E-08 | 1.81E-07           | 9.68E-08 | 1.53E-05           | 3.68E-07 |
|               |                         | Full External Error | 26        | 1.10 | Statistical T ratio |           | N1295-02          | 7.45E-07           | 2.91E-08 | 1.47E-07           | 1.03E-08 | 2.33E-07           | 2.14E-08 | 1.81E-07           | 9.68E-08 | 1.53E-05           | 3.68E-07 |
|               |                         | Analytical Error    | 4         |      |                     |           | N1295-03          | 7.73E-07           | 1.07E-07 | 1.29E-07           | 7.20E-09 | 1.52E-07           | 1.45E-08 | 9.04E-08           | 7.05E-08 | 1.44E-05           | 3.89E-07 |
|               |                         |                     |           |      |                     |           | N1295-04          | 7.73E-07           | 1.07E-07 | 1.29E-07           | 7.20E-09 | 1.52E-07           | 1.45E-08 | 9.04E-08           | 7.05E-08 | 1.44E-05           | 3.89E-07 |
|               |                         |                     |           |      |                     |           | N1295-05          | 6.58E-07           | 2.11E-08 | 1.25E-07           | 1.26E-08 | 2.39E-07           | 1.17E-08 | 3.49E-08           | 3.45E-08 | 9.66E-06           | 3.19E-07 |
|               |                         |                     |           |      |                     |           | N1295-06          | 6.58E-07           | 2.11E-08 | 1.25E-07           | 1.26E-08 | 2.39E-07           | 1.17E-08 | 3.49E-08           | 3.45E-08 | 9.66E-06           | 3.19E-07 |
|               |                         |                     |           |      |                     |           | N1295-07          | 7.40E-07           | 2.07E-08 | 1.36E-07           | 1.47E-08 | 2.13E-07           | 1.81E-08 | 4.27E-07           | 1.15E-07 | 1.37E-05           | 3.82E-07 |
|               |                         |                     |           |      |                     |           | N1295-08          | 7.40E-07           | 2.07E-08 | 1.36E-07           | 1.47E-08 | 2.13E-07           | 1.81E-08 | 4.27E-07           | 1.15E-07 | 1.37E-05           | 3.82E-07 |
|               |                         |                     |           |      |                     |           | N1295-09          | 7.40E-07           | 2.07E-08 | 1.36E-07           | 1.47E-08 | 2.13E-07           | 1.81E-08 | 4.27E-07           | 1.15E-07 | 1.37E-05           | 3.82E-07 |
|               |                         |                     |           |      |                     |           | N1295-10          | 6.06E-07           | 1.82E-08 | 1.60E-07           | 7.67E-09 | 2.27E-07           | 8.18E-09 | 2.62E-07           | 1.13E-07 | 1.24E-05           | 5.10E-07 |
|               |                         |                     |           |      |                     |           | N1295-11          | 6.06E-07           | 1.82E-08 | 1.60E-07           | 7.67E-09 | 2.27E-07           | 8.18E-09 | 2.62E-07           | 1.13E-07 | 1.24E-05           | 5.10E-07 |
|               |                         |                     |           |      |                     |           | N1295-12          | 6.06E-07           | 1.82E-08 | 1.60E-07           | 7.67E-09 | 2.27E-07           | 8.18E-09 | 2.62E-07           | 1.13E-07 | 1.24E-05           | 5.10E-07 |
|               |                         |                     |           |      |                     |           | N1295-13          | 6.06E-07           | 1.82E-08 | 1.60E-07           | 7.67E-09 | 2.27E-07           | 8.18E-09 | 2.62E-07           | 1.13E-07 | 1.24E-05           | 5.10E-07 |
|               |                         |                     |           |      |                     |           | N1295-14          | 4.67E-07           | 1.68E-08 | 1.39E-07           | 8.78E-09 | 1.60E-07           | 2.07E-08 | 7.50E-08           | 7.42E-08 | 1.03E-05           | 2.17E-07 |

| Results          | 40(a)/36(a) ± 1σ | 40(r)/39(k) ± 1σ        | Age ± 1σ (ka) | MSWD |
|------------------|------------------|-------------------------|---------------|------|
| Inverse Isochron | 248 ± 26.00%     | 2.1313 ± 0.0022 ± 1.05% | 2784 ± 31     | 0.9  |
|                  |                  | Full External Error     | 39            |      |
|                  |                  | Analytical Error        | 29            |      |
